# Supplementary material
Source: publisher figshare collection journal article supplement (https://sage.figshare.com/ndownloader/files/18743591)
Supplement: Supplementary file 1 [file 18743591]

**Appendix (supplementary file) 1: Prevalence of laryngeal and extra-laryngeal signs associated with LPR.**

| <b>Items of Reflux Sign Assessment</b>                                                                                     | <b>%</b> |
|----------------------------------------------------------------------------------------------------------------------------|----------|
| <b>Oral cavity</b>                                                                                                         |          |
| Anterior plicas erythema                                                                                                   | 91.0     |
| Uvula erythema                                                                                                             | 69.0     |
| Uvula edema                                                                                                                | 39.5     |
| Coated tongue                                                                                                              | 49.4     |
| <b>Pharyngeal cavity</b>                                                                                                   |          |
| Nasopharyngeal wall erythema ± inflammatory granulations                                                                   | 49.2     |
| Posterior oro- or hypopharyngeal wall erythema                                                                             | 89.5     |
| Posterior oro- or hypopharyngeal wall inflammatory granulations                                                            | 73.7     |
| Tongue tonsil hypertrophy with unapparent vallecula                                                                        | 62.8     |
| Contact between epiglottitis and tongue tonsils                                                                            | 62.6     |
| Pharyngeal sticky mucus                                                                                                    | 82.8     |
| <b>Larynx</b>                                                                                                              |          |
| <i>Subglottic area</i>                                                                                                     |          |
| Subglottic edema                                                                                                           | 4.0      |
| Subglottic erythema                                                                                                        | 11.1     |
| <i>Supraglottic area</i>                                                                                                   |          |
| Ventricular band edema                                                                                                     | 38.8     |
| Ventricular band erythema                                                                                                  | 54.1     |
| Epiglottis edema                                                                                                           | 32.6     |
| Epiglottis redness                                                                                                         | 60.5     |
| <i>Posterior commissure &amp; retro-cricoid</i>                                                                            |          |
| Inter-arytenoid erythema                                                                                                   | 94.9     |
| Inter-arytenoid granulatory tissue                                                                                         | 41.5     |
| Erythema of the posterior commissure                                                                                       | 64.3     |
| Posterior commissure hypertrophy                                                                                           | 88.9     |
| Retro-cricoid erythema                                                                                                     | 63.2     |
| Retro-cricoid edema (=contact between retro-cricoid area & hypopharyngeal posterior wall during breathing/opening glottis) | 77.3     |
| <b>Vocal folds</b>                                                                                                         |          |
| Endolaryngeal sticky mucus                                                                                                 | 78.5     |
| Redness                                                                                                                    | 11.3     |
| Edema of the free-edge of the vocal folds                                                                                  | 2.0      |
| Vocal fold lesions (associated with reflux)                                                                                |          |
| - <i>Granuloma(s)</i>                                                                                                      | 3.2      |
| - <i>Nodules</i>                                                                                                           | 0.0      |
| - <i>Polyyps or hemorrhages</i>                                                                                            | 0.0      |
| - <i>Reinke's edema</i>                                                                                                    | 1.0      |
| - <i>Laryngeal or vocal fold keratosis</i>                                                                                 | 2.0      |
| - <i>Ulcerations</i>                                                                                                       | 0.0      |

**Appendix 1 footnotes:** The prevalence of the LPR-associated signs was determined in 101 patients with LPR disease regarding MII-pH. The weight assignment of each finding of RSA was based on these prevalence results: for each patient, the occurrence (=1) or absence (=0) of the findings described in the RSA on mouth photos and videolaryngostroboscopy was assessed. Findings that were present in  $\geq 80.0\%$  of patients received a high weight of 4 in the RSA; findings found between 60.0% and 79.9% received a weight of 3; findings found between 40.0% and 59.9% received a weight of 2; and those found in  $<40.0\%$  received a weight of 1. Abbreviations: LPR = laryngopharyngeal reflux; MII-pH = multichannel intraluminal impedance-pH monitoring.

**Appendix 2 (supplementary file): Test-retest reliability.**

| <b>Reflux Sign Assessment items</b>                                | <b>r<sub>s</sub></b> | <b>p-value</b>   |
|--------------------------------------------------------------------|----------------------|------------------|
| 1. Anterior pillar erythema                                        | 0.791                | <0.001           |
| 2. Uvula erythema ± edema                                          | 0.583                | 0.007            |
| 3. Coated tongue                                                   | 0.575                | 0.013            |
| <b>Oral cavity subscore</b>                                        | <b>0.740</b>         | <b>&lt;0.001</b> |
| 1. Nasopharyngeal wall erythema ± inflammatory granulations        | 0.655                | 0.006            |
| 2. Posterior oro- or hypopharyngeal wall erythema                  | 0.464                | 0.022            |
| 3. Posterior oro- or hypopharyngeal wall inflammatory granulations | 0.811                | <0.001           |
| 4. Tongue tonsil hypertrophy                                       | 0.850                | <0.001           |
| 5. Contact between epiglottitis and tongue tonsils                 | 0.882                | <0.001           |
| 6. Pharyngeal sticky mucus                                         | 0.603                | 0.001            |
| <b>Pharyngeal cavity subscore</b>                                  | <b>0.664</b>         | <b>&lt;0.001</b> |
| <i>Sub- and supraglottic areas</i>                                 |                      |                  |
| 1. Subglottic edema ± erythema                                     | 0.990*               | <0.001           |
| 2. Ventricular band erythema ± edema                               | 0.514                | 0.020            |
| 3. Epiglottis redness ± edema                                      | 0.630                | 0.004            |
| <i>Posterior commissure &amp; retro-cricoid</i>                    |                      |                  |
| 1. Commissure posterior/arytenoid erythema                         | 0.743                | <0.001           |
| 2. Inter-arytenoid granulatory tissue                              | 0.990                | <0.001           |
| 3. Posterior commissure hypertrophy                                | 0.554                | 0.011            |
| 4. Retro-cricoid erythema                                          | 0.443                | 0.050            |
| 5. Retro-cricoid edema                                             | 0.533                | 0.015            |
| <i>Vocal folds</i>                                                 |                      |                  |
| 1. Endolaryngeal sticky mucus deposit                              | 0.892                | <0.001           |
| 2. Vocal fold erythema                                             | 0.990*               | <0.001           |
| 3. Edema of the free-edge or the entire vocal folds                | 0.990*               | <0.001           |
| 4. Vocal fold lesions                                              | 1.000                | <0.001           |
| <b>Laryngeal subscore</b>                                          | <b>0.655</b>         | <b>&lt;0.001</b> |
| <b>RSA Total score:</b>                                            | <b>0.813</b>         | <b>&lt;0.001</b> |

**Appendix 2 footnotes:** \*The r<sub>s</sub> is significant but the number of patients with this sign was low (N<5); limiting the consistence of the r<sub>s</sub>. Abbreviations: r<sub>s</sub> = Spearman rho; RSA = reflux sign assessment.

### Appendix 3: Instrument analysis.

| Instrument                     | Studied population | Construct definition | Content validity | Internal consistency | Test-retest reliability    | Concordance                              | Convergent validity | Known-groups validity | Responsiveness to change | Interpretability & scoring |
|--------------------------------|--------------------|----------------------|------------------|----------------------|----------------------------|------------------------------------------|---------------------|-----------------------|--------------------------|----------------------------|
| RFS <sup>5</sup>               | LPR patients       | +                    | +/-              | N.P.                 | Total: 0.95<br>Item: >0.90 | 0.90<br>2 physicians                     | N.P.                | +                     | +                        | +                          |
| LRG <sup>20</sup>              | LPR patients       | +                    | +                | N.P.                 | Total: 0.83-0.90           | 0.43<br>3 physicians                     | N.P.                | N.P.                  | +                        | +/-                        |
| CPLI <sup>21</sup>             | LPR patients       | +                    | +/-              | N.P.                 | N.P.                       | N.P.                                     | N.P.                | N.P.                  | +                        | +/-                        |
| Vaezi Instrument <sup>22</sup> | LPR patients       | +                    | +                | N.P.                 | 0.26-0.78                  | 0.32-0.58<br>1 physician<br>1 Speech th. | N.P.                | +                     | +                        | N.A.                       |
| LRDI <sup>23</sup>             | Suspected LPR      | +                    | +                | N.P.                 | 0.42-0.78                  | 0.30<br>3 physicians                     | N.P.                | +                     | +                        | +/-                        |
| LGS <sup>24</sup>              | Suspected LPR      | +                    | +/-              | N.P.                 | N.P.                       | 0.75-0.93<br>3 physicians                | N.P.                | N.P.                  | +                        | +/-                        |

**Appendix 3 footnotes:** CPLI = chronic posterior laryngitis index; LGS = laryngoscopic grading scale; LPR = laryngopharyngeal reflux; LRDI = laryngopharyngeal reflux disease index; LRG = laryngeal reflux grade; N.A. = not available; N.P. = not provided (the analysis was not made); RFS = reflux finding Score; + = the conducted analysis was completely consistent with our definition; +/- = the conducted analysis was partly consistent with our definition; - = the analysis was inconsistent.
